# Supplementary material for: Role of genetic polymorphisms in clopidogrel response variability: a systematic review
Source: PubMed Central journal article supplement — Open Heart. 2023 Nov 14;10(2):e002436. doi: 10.1136/openhrt-2023-002436 (PMC10649851; doi:10.1136/openhrt-2023-002436), 2023-11-14
Supplement: openhrt-2023-002436supp001.pdf [file openhrt-2023-002436supp001.pdf]

Supplemental Appendix:

Supplemental Table 1: Frequencies of CYP2C19 alleles in biogeographical groups

Supplemental Table 2: Frequencies of CYP2C19 phenotypes in biogeographical groups

| Frequencies of CYP2C19 alleles in biogeographical groups |                                 |          |                     |            |          |        |              |          |                     |
|----------------------------------------------------------|---------------------------------|----------|---------------------|------------|----------|--------|--------------|----------|---------------------|
| CYP2C19 allele                                           | African American/Afro-Caribbean | American | Central/South Asian | East Asian | European | Latino | Near Eastern | Oceanian | Sub-Saharan African |
| *1                                                       | 54.68%                          | 79.22%   | 54.36%              | 59.55%     | 62.51%   | 71.66% | 67.23%       | 18.71%   | 55.15%              |
| *2                                                       | 18.15%                          | 12.14%   | 26.99%              | 28.35%     | 14.69%   | 10.42% | 11.98%       | 60.95%   | 15.68%              |
| *3                                                       | 0.28%                           | 0.04%    | 1.57%               | 7.25%      | 0.16%    | 0.08%  | 1.65%        | 14.64%   | 0.27%               |
| *4                                                       | 0.00%                           | 0.00%    | 0.00%               | 0.02%      | 0.24%    | 0.05%  | 0.00%        |          | 0.00%               |
| *5                                                       | 0.00%                           | 0.00%    | 0.00%               | 0.32%      | 0.00%    | 0.00%  | 0.00%        |          | 0.00%               |
| *6                                                       | 0.00%                           |          | 0.00%               | 0.06%      | 0.03%    | 0.00%  | 0.00%        |          | 0.00%               |
| *7                                                       | 0.00%                           |          | 0.00%               | 0.01%      | 0.00%    | 0.00%  |              |          | 0.00%               |
| *8                                                       | 0.11%                           | 0.00%    | 0.00%               | 0.00%      | 0.34%    | 0.13%  | 0.00%        |          | 0.00%               |
| *9                                                       | 1.43%                           |          |                     | 0.01%      | 0.07%    | 0.08%  |              |          | 2.70%               |
| *10                                                      | 0.33%                           |          |                     | 0.01%      | 0.00%    | 0.12%  | 0.00%        |          | 0.00%               |
| *11                                                      |                                 |          |                     | 0.00%      |          |        | 0.00%        |          |                     |
| *12                                                      | 0.11%                           |          |                     | 0.01%      | 0.00%    | 0.00%  |              |          | 0.00%               |
| *13                                                      | 1.20%                           |          |                     | 0.01%      | 0.22%    | 0.40%  |              |          | 0.00%               |
| *14                                                      | 0.00%                           | 0.00%    |                     | 0.01%      | 0.00%    | 0.00%  |              |          | 0.00%               |
| *15                                                      | 1.40%                           |          |                     | 0.14%      | 0.20%    | 0.40%  |              |          | 5.29%               |
| *16                                                      | 0.00%                           |          |                     | 0.00%      | 0.00%    | 0.00%  |              |          |                     |
| *17                                                      | 20.72%                          | 8.61%    | 17.08%              | 2.05%      | 21.54%   | 16.66% | 19.14%       | 5.70%    | 17.33%              |
| *18                                                      |                                 |          |                     | 1.99%      |          |        |              |          |                     |
| *19                                                      |                                 |          |                     | 0.02%      |          |        |              |          |                     |
| *22                                                      | 0.00%                           |          |                     | 0.00%      | 0.00%    | 0.00%  |              |          |                     |
| *23                                                      |                                 |          |                     | 0.06%      |          |        |              |          |                     |
| *24                                                      |                                 |          |                     | 0.02%      |          |        |              |          |                     |
| *25                                                      |                                 |          |                     | 0.02%      |          |        |              |          |                     |
| *26                                                      |                                 |          |                     | 0.00%      |          |        |              |          |                     |
| *28                                                      |                                 |          |                     | 0.00%      |          |        |              |          | 0.37%               |
| *29                                                      |                                 |          |                     | 0.02%      |          |        |              |          |                     |
| *30                                                      |                                 |          |                     | 0.02%      |          |        |              |          |                     |
| *31                                                      |                                 |          |                     | 0.02%      |          |        |              |          |                     |
| *32                                                      |                                 |          |                     | 0.02%      |          |        |              |          |                     |
| *33                                                      |                                 |          |                     | 0.02%      |          |        |              |          |                     |
| *34                                                      |                                 |          |                     | 0.00%      |          |        |              |          |                     |
| *35                                                      | 1.59%                           |          |                     | 0.00%      | 0.00%    |        |              |          | 3.21%               |

Supplemental Table 1: Clinical Pharmacogenetics Implementation Consortium (CPIC®) multiethnic CYP2C19 allelic frequencies. This table was obtained on the CCO 1.0 Universal (CCO 1.0) Public Domain Dedication. Obtained from: CPIC®. “Guideline for Clopidogrel and CYP2C19”. [cpicpgx.org](https://cpicpgx.org); Date Accessed 09/17/2023. Gene-specific information tables can be found at <https://www.pharmgkb.org/page/pgxGeneRef>. Original publication by Lee et al. <sup>39,40</sup>

| Frequencies of CYP2C19 phenotypes in biogeographical groups |                                 |          |                     |            |          |        |              |          |                     |
|-------------------------------------------------------------|---------------------------------|----------|---------------------|------------|----------|--------|--------------|----------|---------------------|
| Phenotype                                                   | African American/Afro-Caribbean | American | Central/South Asian | East Asian | European | Latino | Near Eastern | Oceanian | Sub-Saharan African |
| Ultrarapid Metabolizer                                      | 4.29%                           | 0.74%    | 2.92%               | 0.04%      | 4.64%    | 2.77%  | 3.66%        | 0.32%    | 3.00%               |
| Rapid Metabolizer                                           | 23.74%                          | 13.64%   | 18.57%              | 2.53%      | 27.12%   | 24.14% | 25.74%       | 2.13%    | 21.08%              |
| Poor Metabolizer                                            | 4.05%                           | 1.48%    | 8.16%               | 12.98%     | 2.39%    | 1.14%  | 1.86%        | 57.14%   | 3.67%               |
| Normal Metabolizer                                          | 32.81%                          | 62.76%   | 29.55%              | 38.06%     | 39.61%   | 52.50% | 45.19%       | 3.50%    | 36.98%              |
| Likely Poor Metabolizer                                     | 0.71%                           | 0.00%    | 0.00%               | 0.04%      | 0.02%    | 0.04%  | 0.00%        | 0.00%    | 1.03%               |
| Likely Intermediate Metabolizer                             | 2.78%                           | 0.00%    | 0.00%               | 0.08%      | 0.11%    | 0.37%  | 0.00%        | 0.00%    | 4.29%               |
| Intermediate Metabolizer                                    | 31.40%                          | 21.38%   | 40.81%              | 45.93%     | 26.11%   | 19.04% | 23.55%       | 36.90%   | 29.95%              |
| Indeterminate                                               | 0.22%                           | 0.00%    | 0.00%               | 0.34%      | 0.00%    | 0.00%  | 0.00%        | 0.00%    | 0.00%               |

Supplemental Table 2: Clinical Pharmacogenetics Implementation Consortium (CPIC®) multiethnic CYP2C19 phenotype frequencies. This table was obtained on the CCO 1.0 Universal (CCO 1.0) Public Domain Dedication. Obtained from: CPIC®. Guideline for Clopidogrel and CYP2C19”cpicpgx.org; Date Accessed 09/17/2023. Gene-specific information tables can be found at <https://www.pharmgkb.org/page/pgxGeneRef>. Original publication by Lee et al. <sup>39,40</sup>
